# Supplementary material for: Manganese(ii) thiophosphate (MnPS3) intercalates with lanthanide (PrIII and NdIII) complexes: optical and magnetic properties
Source: Royal Society of Chemistry journal article supplement (doi:10.1039/d2nj02303b), 2022-01-01
Supplement: d2nj02303b1.pdf [file d2nj02303b1.pdf]

## Supplementary Material

–“Manganese(II) Thiophosphate ( $\text{MnPS}_3$ ) Intercalates with Lanthanide ( $\text{Pr}^{\text{III}}$  and  $\text{Nd}^{\text{III}}$ ) Complexes: Optical and Magnetic Properties”

Pablo Fuentealba, Jeannette Morales, Nathalie Audebrand, Claudio José Magon, Hellmut Eckert, Jorge Manzur, Evgenia Spodine

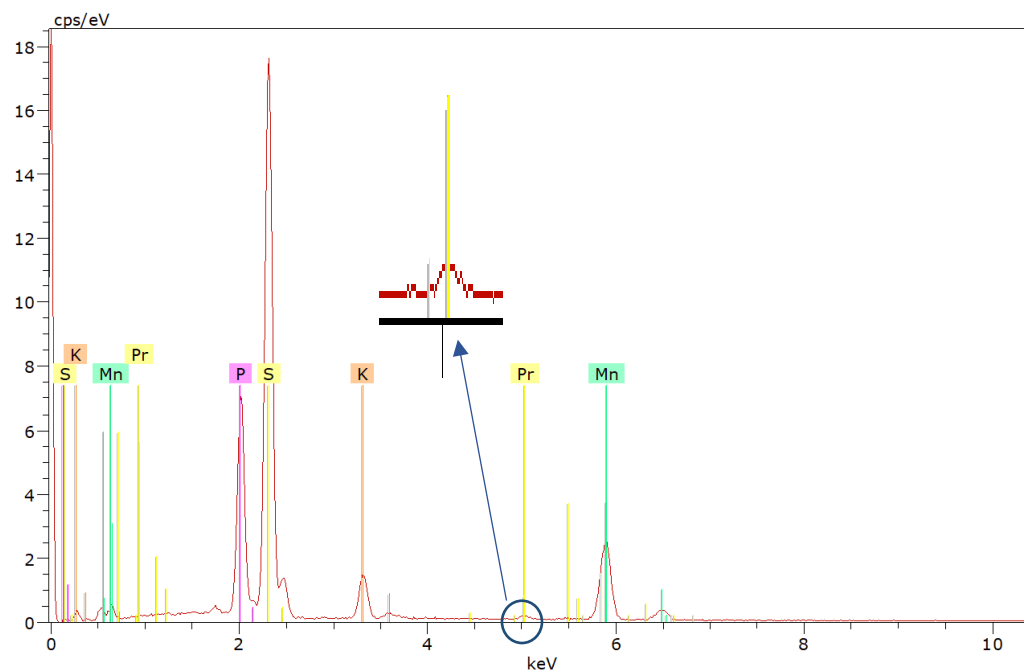

Fig. S1a. SEM EDXS spectrum of (1).

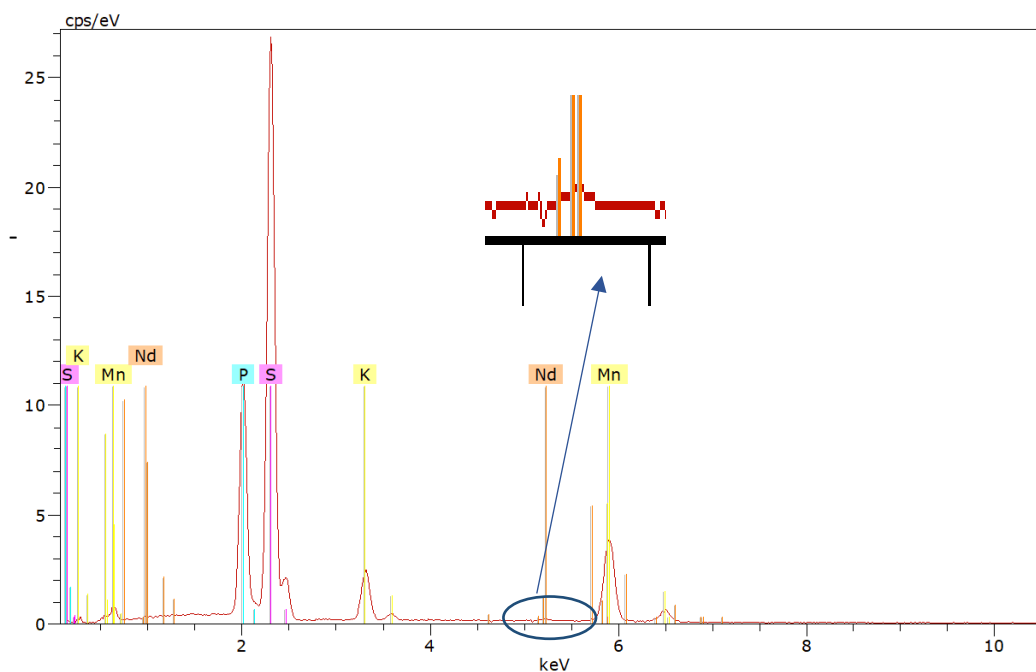

Fig. S1b. SEM EDXS spectrum of (2).

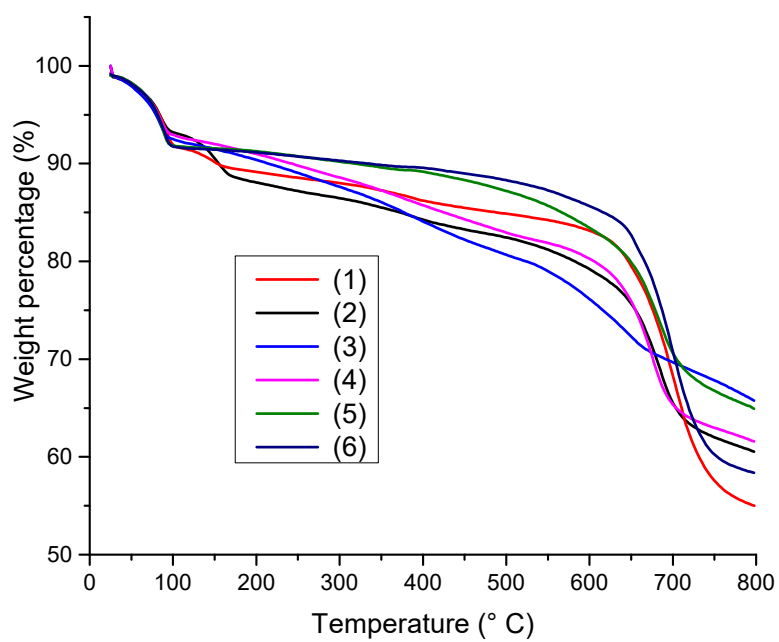

Fig. S2. TGA curves of the intercalation compounds **1-6**.

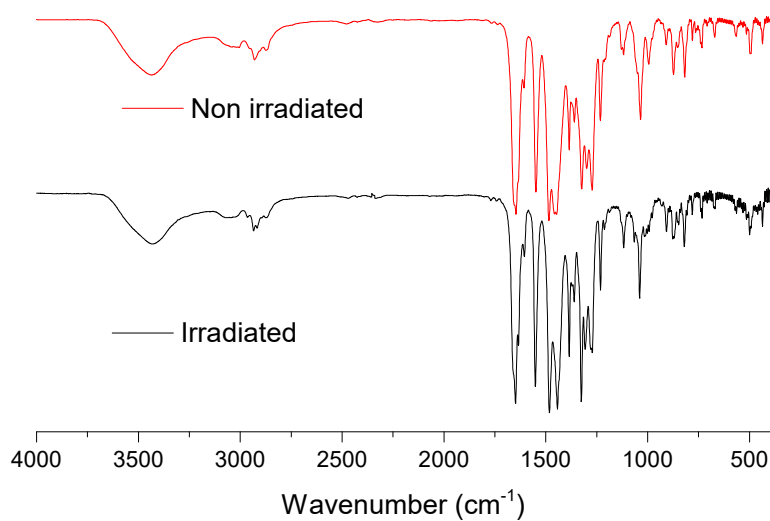

Fig.S3a. FTIR spectra of the [PrL<sup>2</sup>H<sub>2</sub>(NO<sub>3</sub>)<sub>3</sub>] complex before and after irradiation (modification of the spectra was not observed for the irradiated complexes).

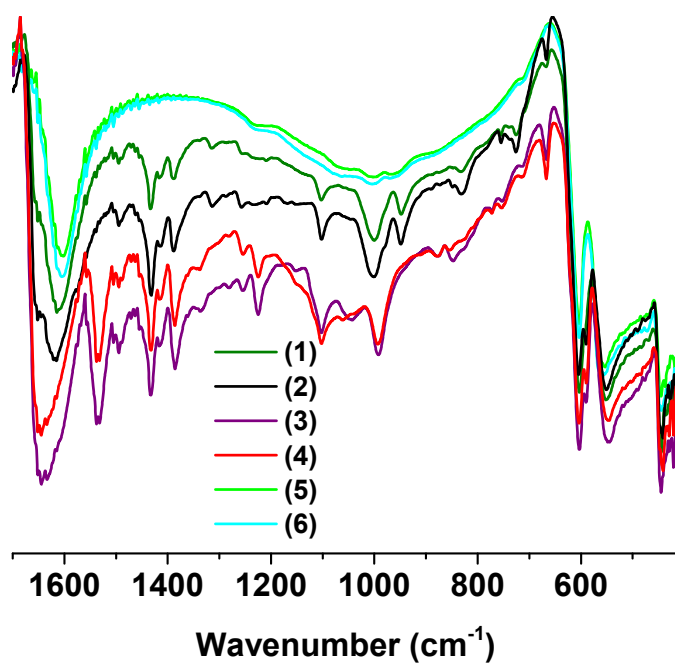

Fig S3b. FTIR spectra of the intercalation compounds *1-6*.

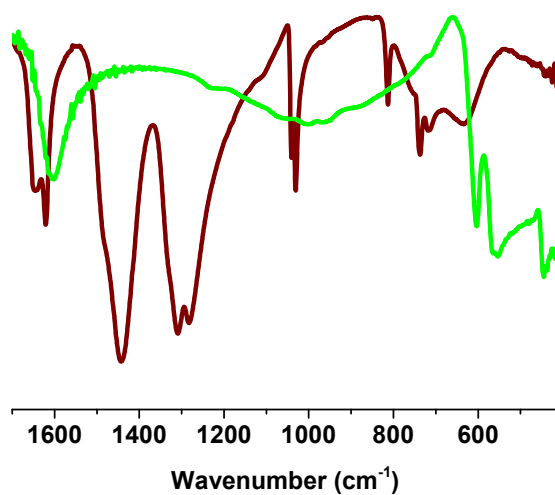

Fig S3c. FTIR spectra of Pr(NO<sub>3</sub>)<sub>3</sub>·xH<sub>2</sub>O salt (brown) and intercalate (5) (light green), indicating the absence of the nitrate band at

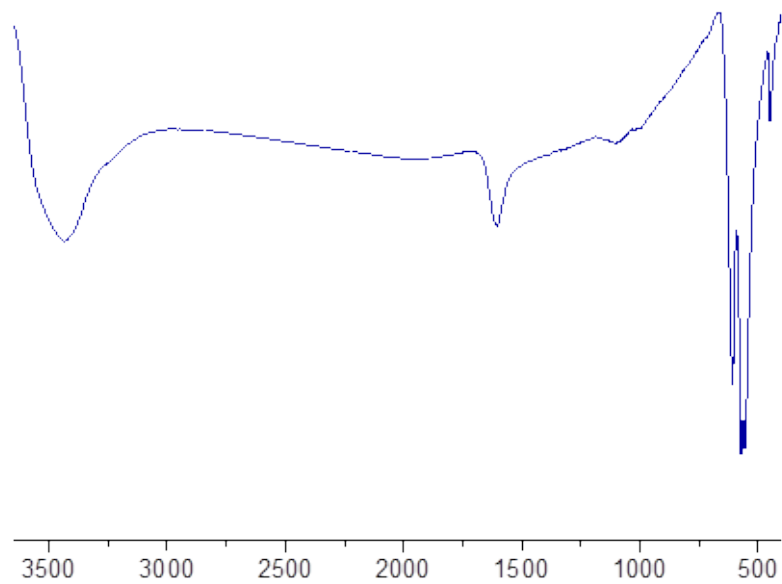

Fig S3d. FTIR Spectrum of  $K_{0.4}Mn_{0.8}PS_3 \cdot H_2O$  .

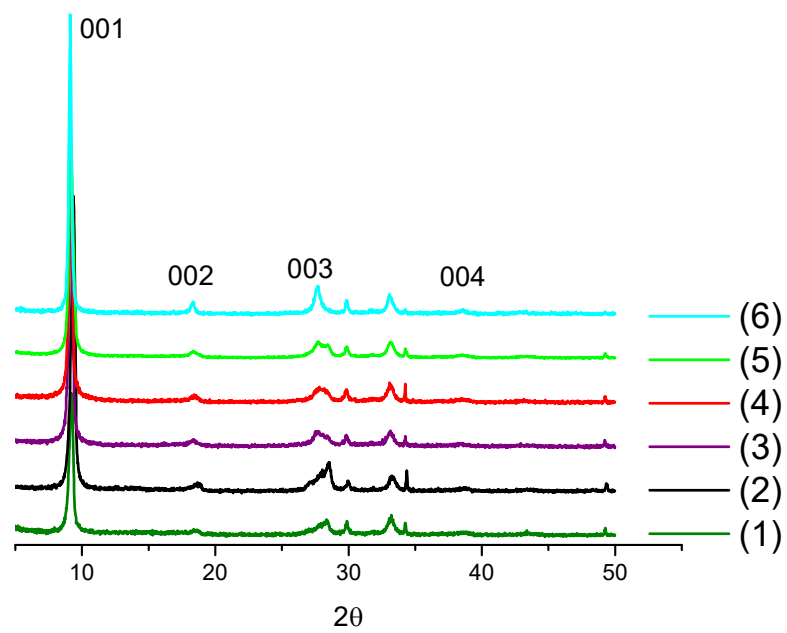

Fig S4. Powder X-ray diffractograms of the obtained intercalates. Reflections with Miller indexes 00/ have been highlighted.

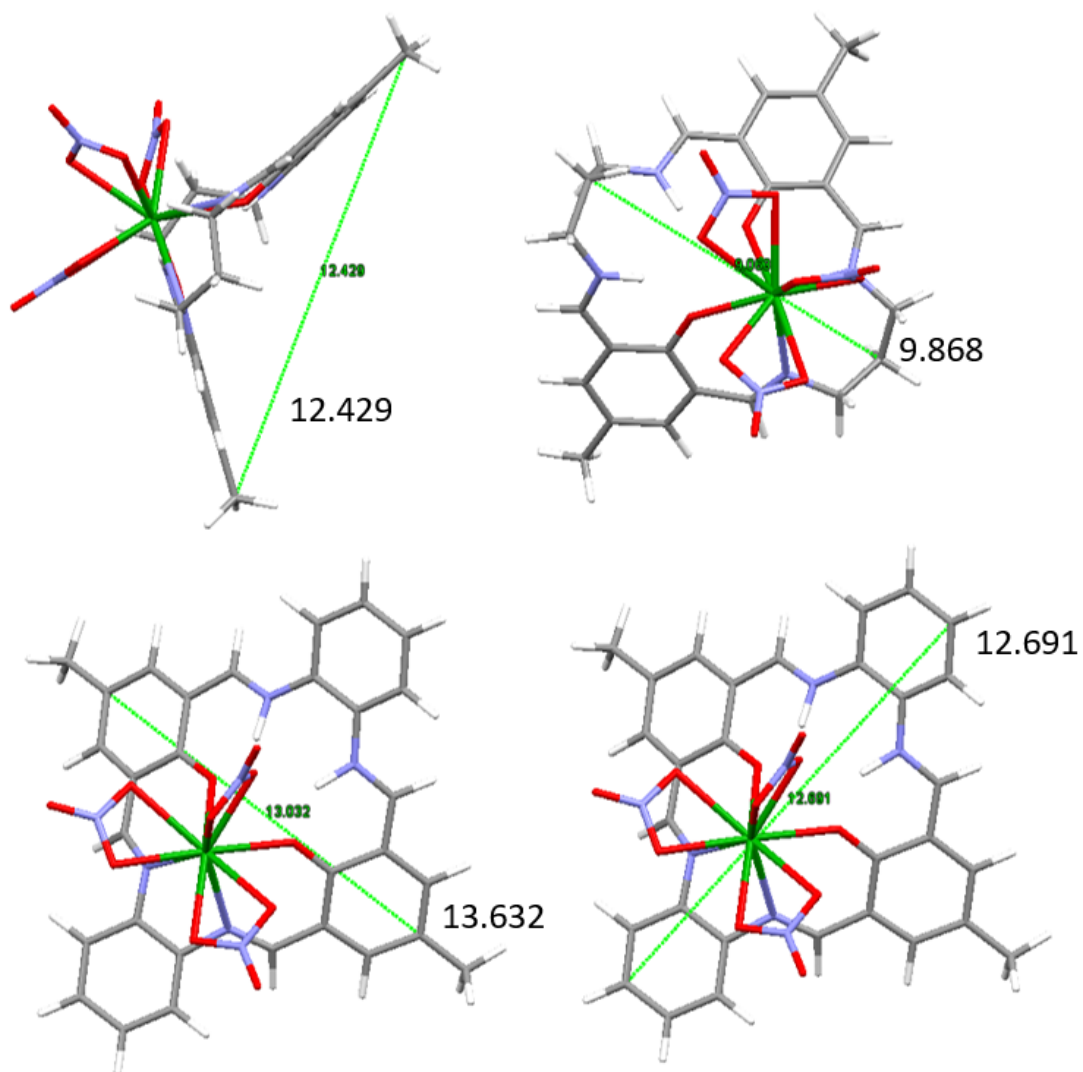

Figure S5. Dimensions of the macrocyclic complexes before the intercalation process.

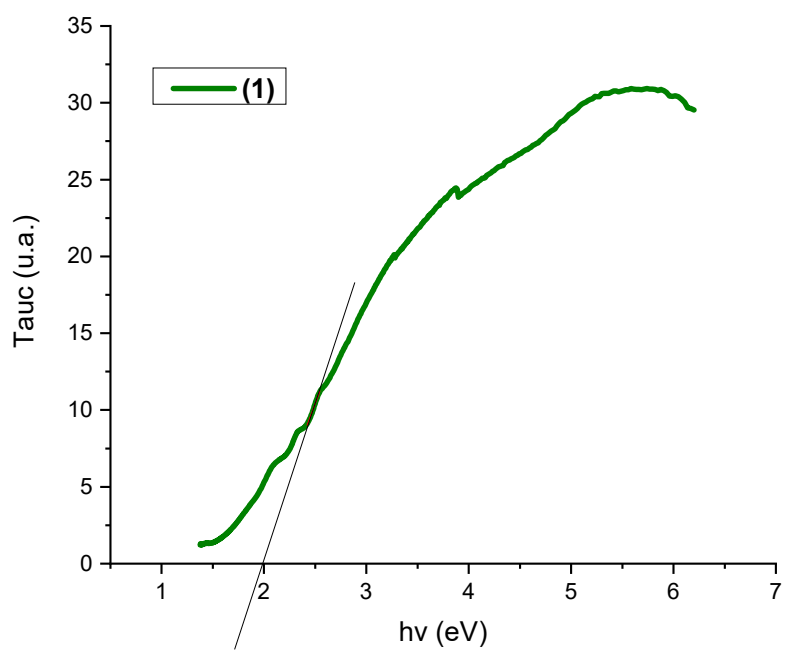

Figure S6a. Tauc plot for composite (1).

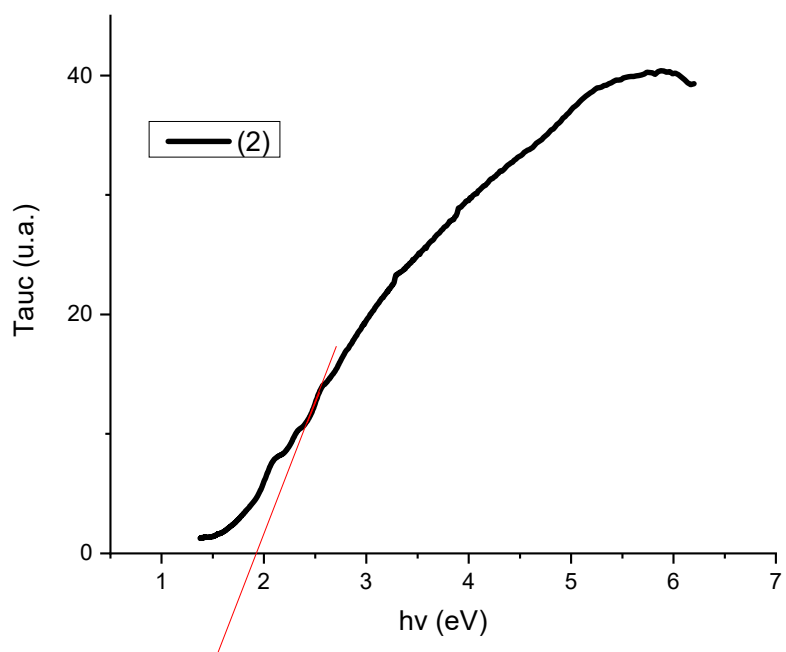

Figure S6b. Tauc plot for composite (2).

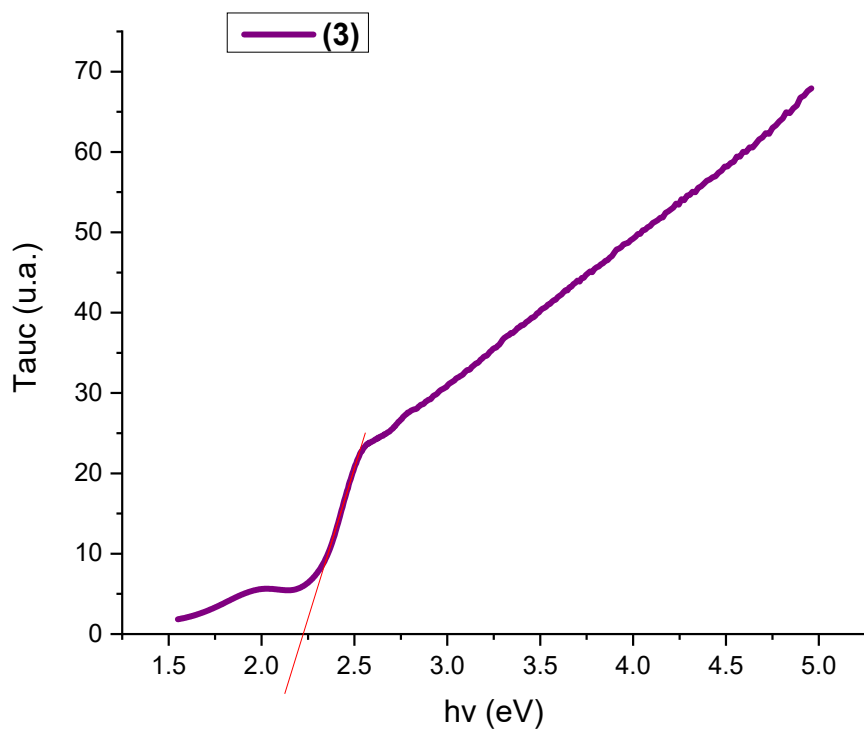

Figure S6c. Tauc plot for composite (3).

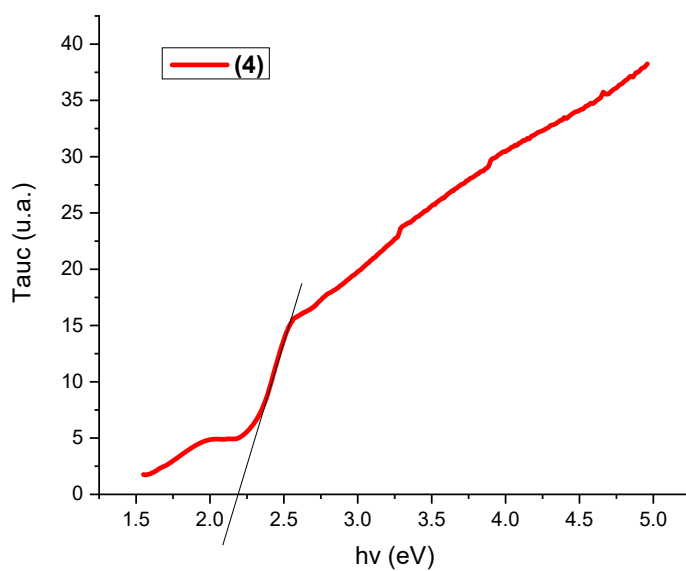

Figure S6d. Tauc plot for composite (4).

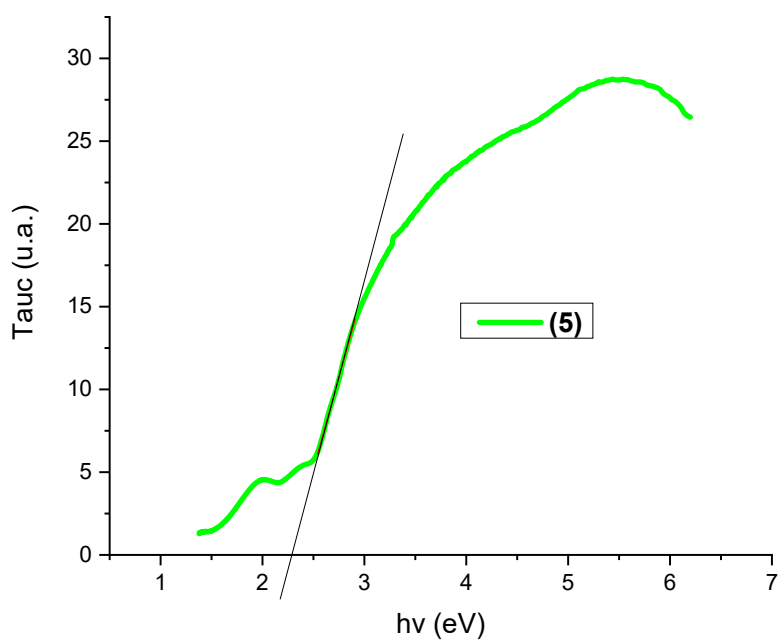

Figure S6e. Tauc plot for composite (5).

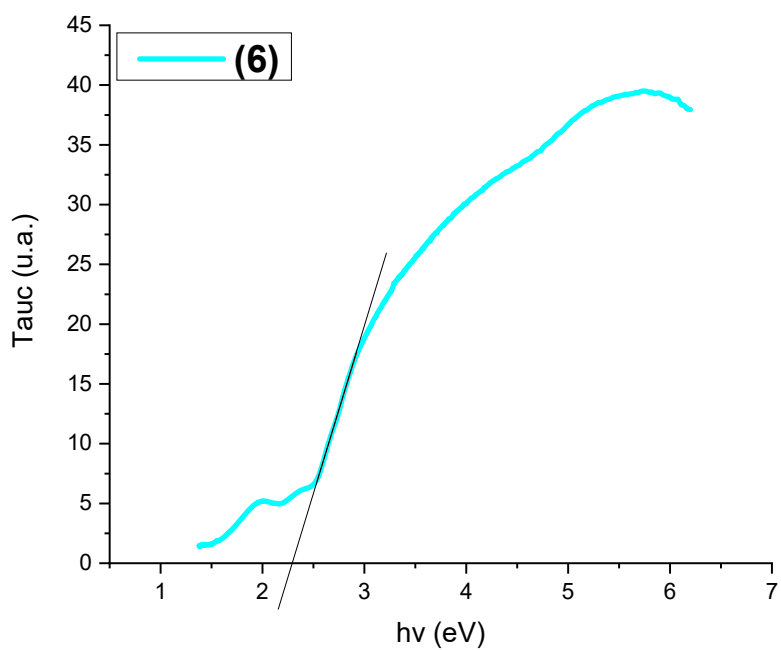

Figure S6f. Tauc plot for composite (6).



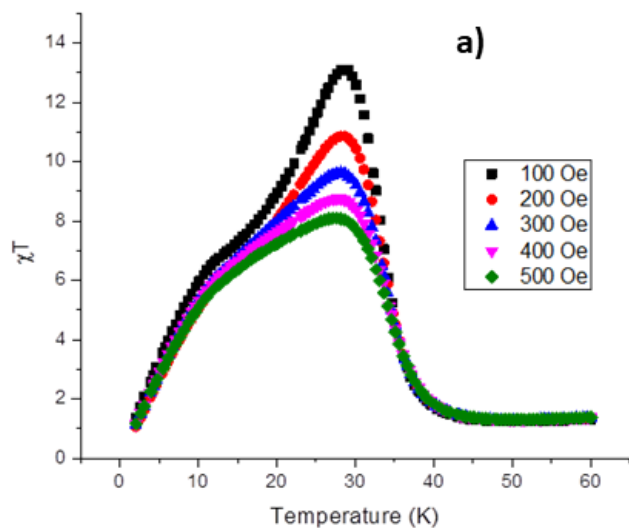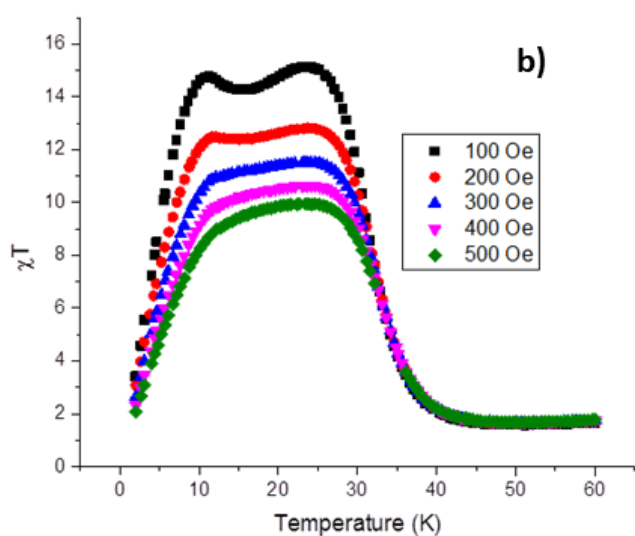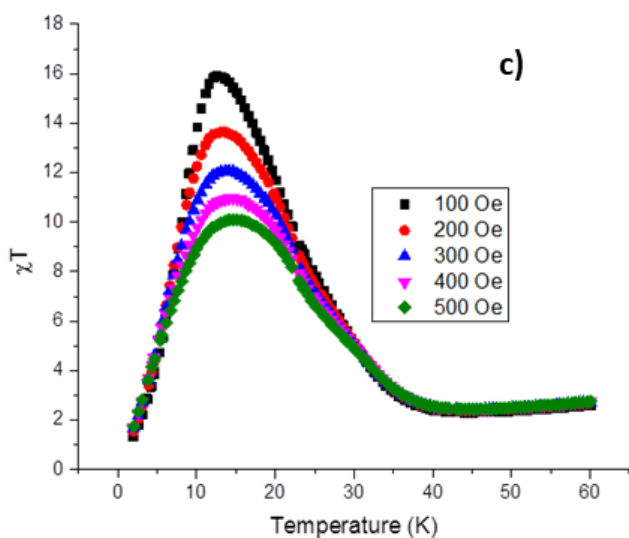

Fig. S7: Temperature dependence of the product  $\chi T$  measured for the intercalates derived from Nd(III) species at different magnetic field strengths.

- a)  $[\text{NdL}^{\text{H}_2}]_{0.01}\text{K}_{0.37}\text{Mn}_{0.8}\text{PS}_3 \cdot 0.9\text{H}_2\text{O}$  (**2**); b)  $[\text{NdL}^{\text{H}_2}]_{0.05}\text{K}_{0.25}\text{Mn}_{0.8}\text{PS}_3 \cdot 0.9\text{H}_2\text{O}$  (**4**);  
 c)  $[\text{Nd}]_{0.03}\text{K}_{0.31}\text{Mn}_{0.8}\text{PS}_3 \cdot 0.8\text{H}_2\text{O}$  (**6**)

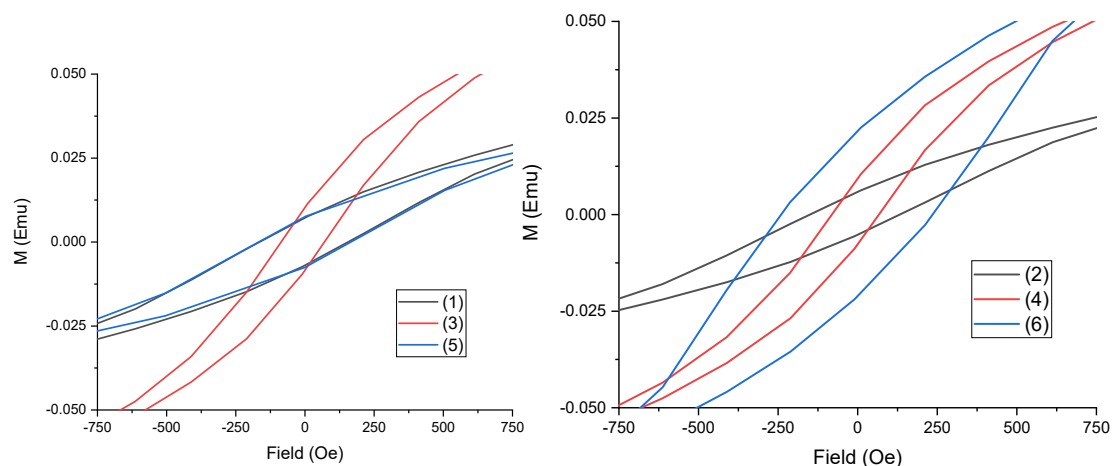

Figure S8. Hysteresis loops for all intercalates; left, for praseodymium intercalates and right, for the neodymium ones.

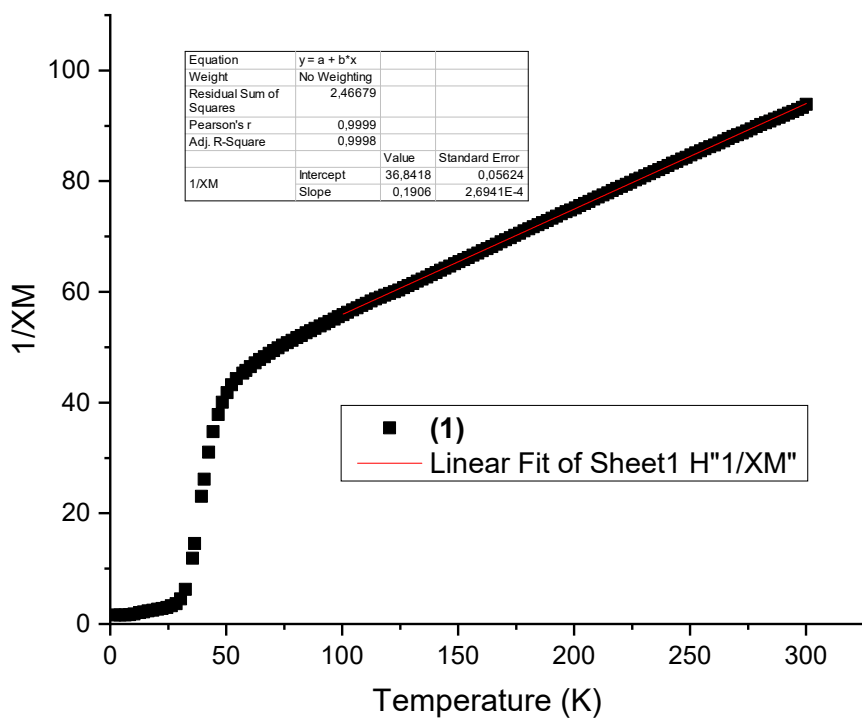

Figure S9a. Curie-Weiss fitting for **(1)**

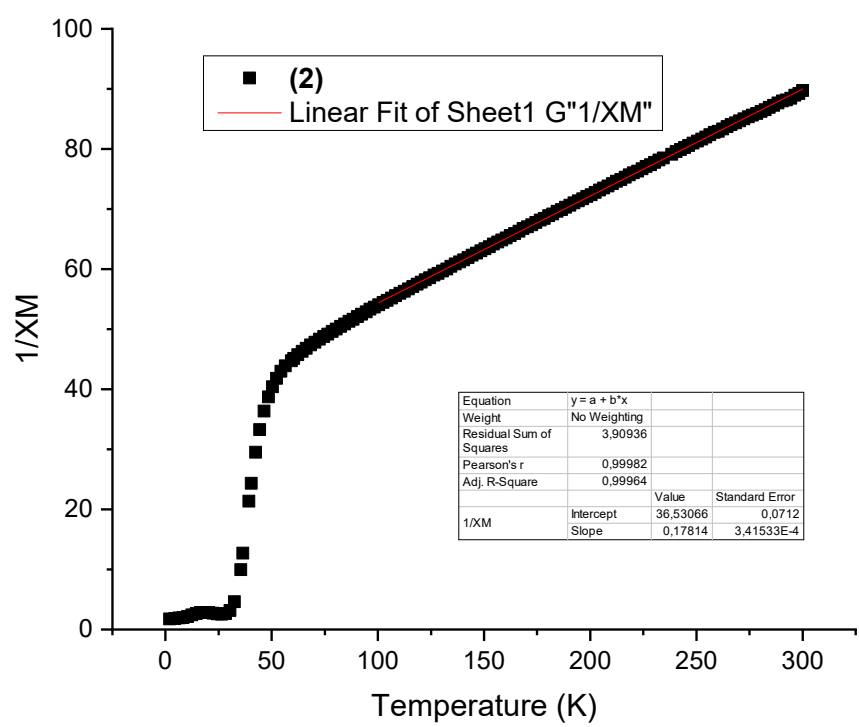

Figure S9b. Curie-Weiss fitting for (2)

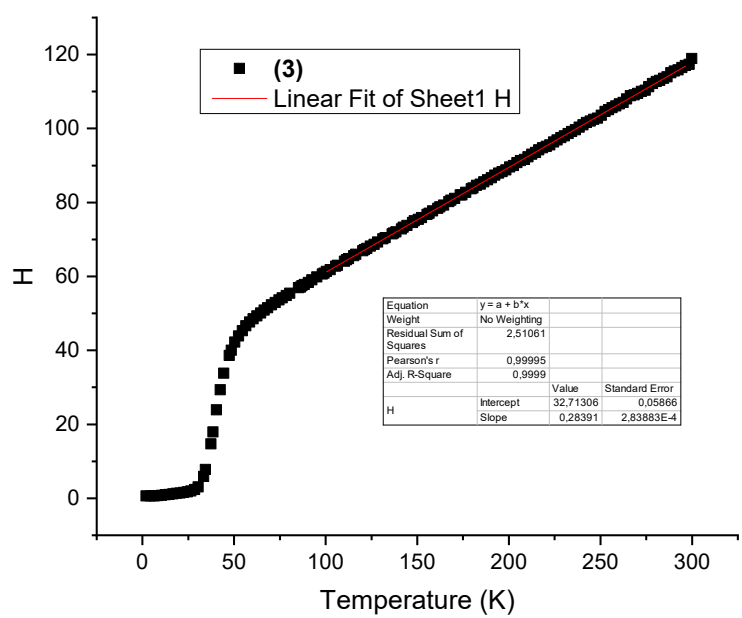

Figure S9c. Curie-Weiss fitting for (3)

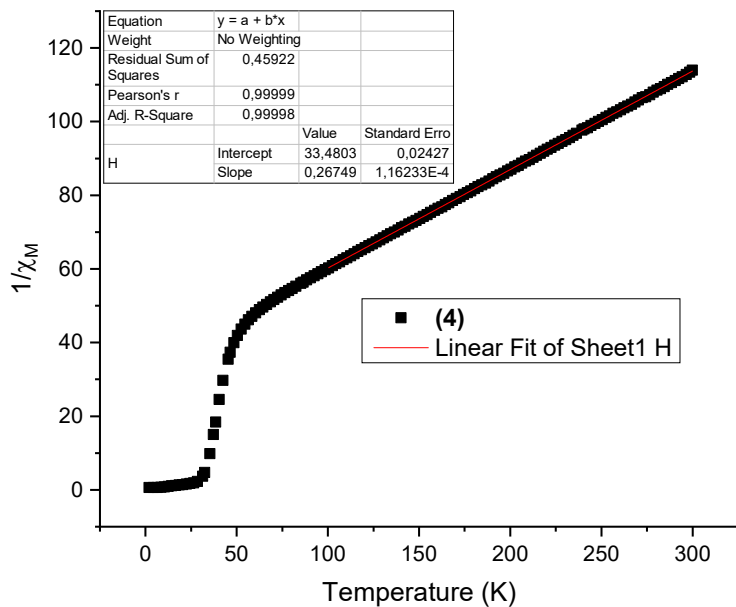

Figure S9d. Curie-Weiss fitting for **(4)**

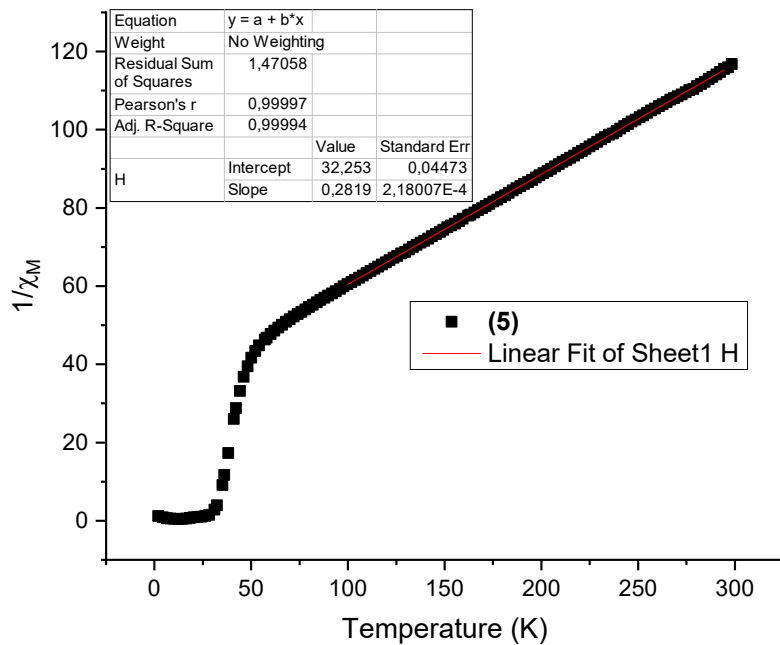

Figure S9e. Curie-Weiss fitting for **(5)**

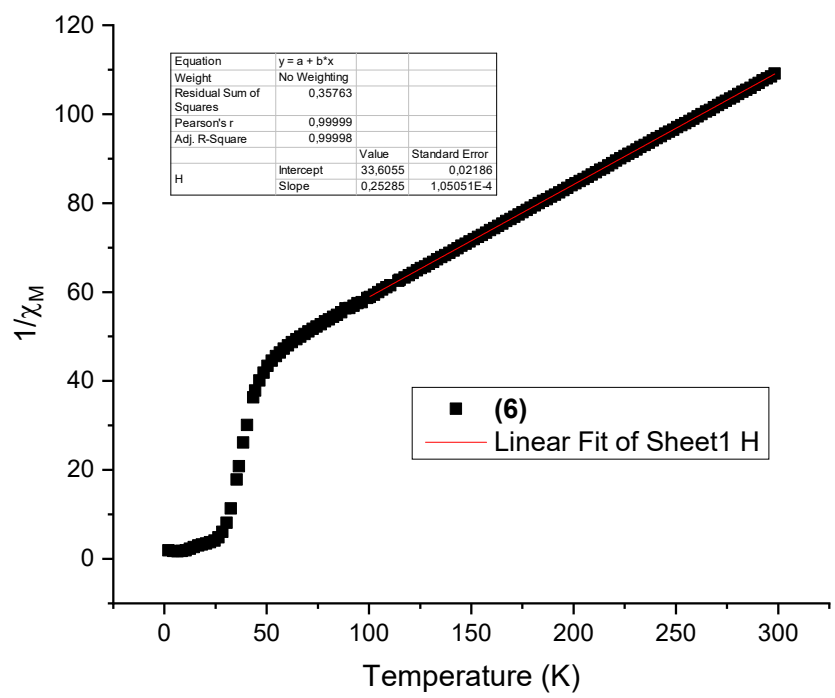

Figure S9f. Curie-Weiss fitting for **(6)**

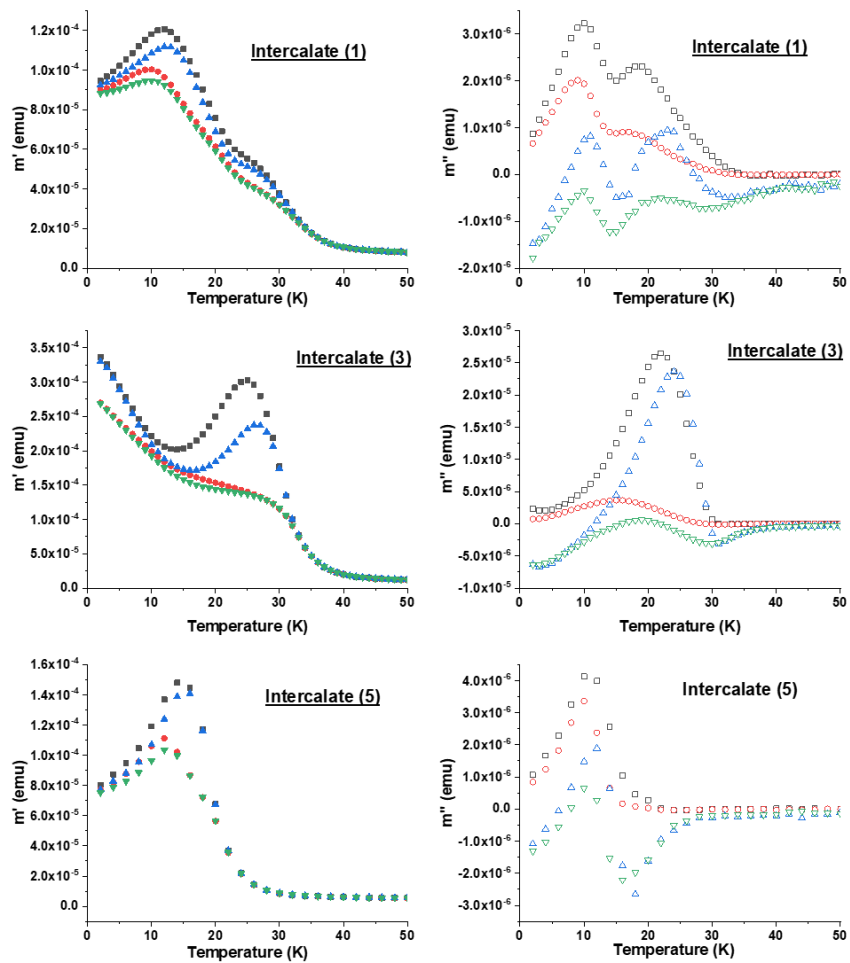

Fig. S9a. AC magnetic susceptibility for the praseodymium(III) intercalates **1,3**, and **5**. Solid symbols for  $m'$  and open symbols for  $m''$ . Drive field 30e. Black squares: 0 Oe-10 Hz. Red circles: 100 Oe-10 Hz. Blue up-triangles: 0 Oe-1.000 Hz. Green down-triangles: 100 Oe-1.000 Hz.

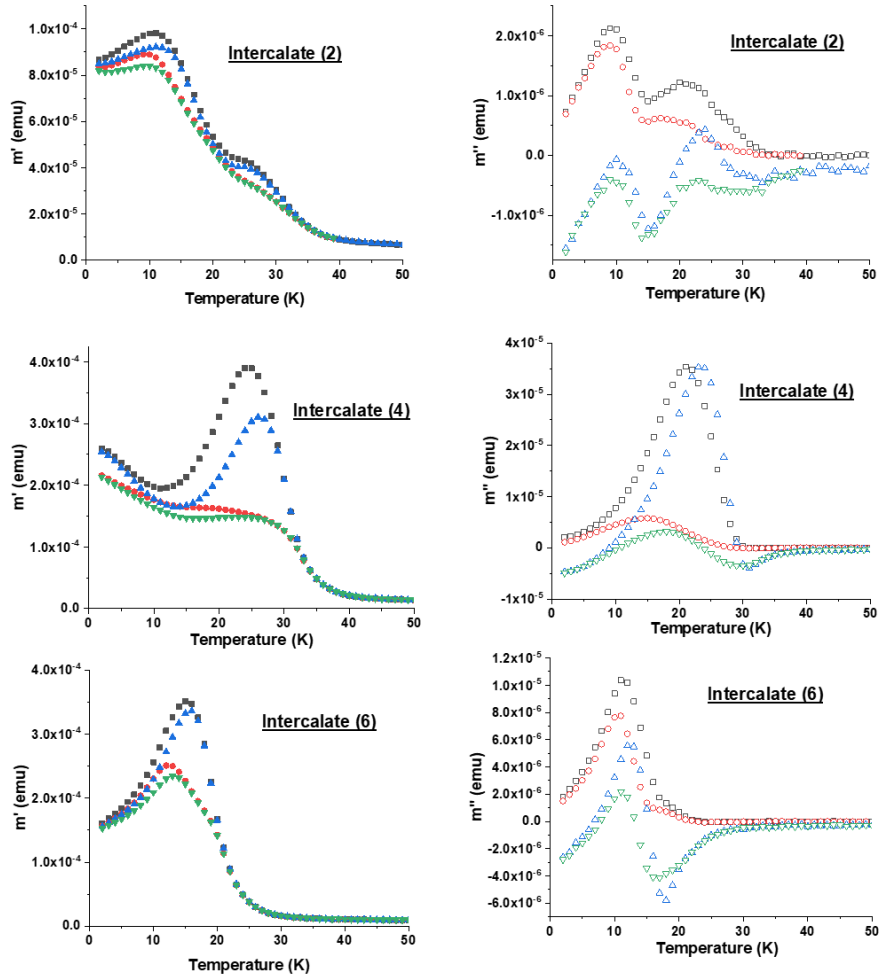

Fig. S9b. AC magnetic susceptibility for the neodymium(III) intercalates **2, 4**, and **6**. Solid symbols for  $m'$  and open symbols for  $m''$ . Drive field 30e. Black squares: 0 Oe-10 Hz. Red circles: 100 Oe-10 Hz. Blue up-triangles: 0 Oe-1.000 Hz. Green down-triangles: 100 Oe-1.000 Hz.

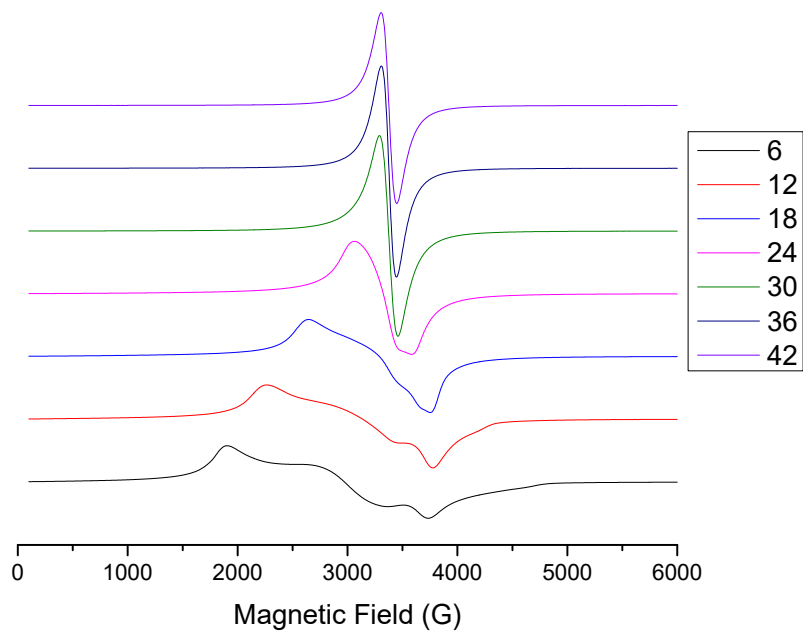

Fig. S10a: Temperature dependent EPR spectra of the intercalate **(6)**

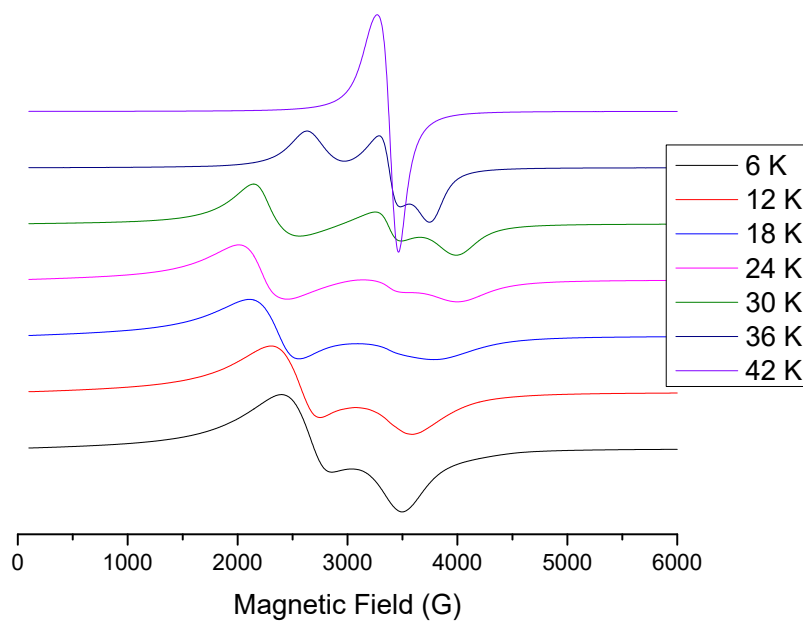

Fig. S10b: Temperature dependent EPR spectra of the intercalate **(2)**



Table S1: Unit-cell parameters refined by pattern-matching for the powder X-ray diffraction patterns. A monoclinic  $C2/m$  unit cell was used.

- (1)  $[\text{PrL}^1\text{H}_2]_{0.01}\text{K}_{0.37}\text{Mn}_{0.8}\text{PS}_3 \cdot 0.9\text{H}_2\text{O}$   
 (2)  $[\text{NdL}^1\text{H}_2]_{0.01}\text{K}_{0.37}\text{Mn}_{0.8}\text{PS}_3 \cdot 0.9\text{H}_2\text{O}$   
 (3)  $[\text{PrL}^2\text{H}_2]_{0.05}\text{K}_{0.25}\text{Mn}_{0.8}\text{PS}_3 \cdot 0.9\text{H}_2\text{O}$   
 (4)  $[\text{NdL}^2\text{H}_2]_{0.05}\text{K}_{0.25}\text{Mn}_{0.8}\text{PS}_3 \cdot 0.9\text{H}_2\text{O}$   
 (5)  $[\text{Pr}]_{0.01}\text{K}_{0.37}\text{Mn}_{0.8}\text{PS}_3 \cdot 0.8\text{H}_2\text{O}$   
 (6)  $[\text{Nd}]_{0.01}\text{K}_{0.37}\text{Mn}_{0.8}\text{PS}_3 \cdot 0.8\text{H}_2\text{O}$

|                   | (1)       | (2)       | (3)       | (4)       | (5)       | (6)       |
|-------------------|-----------|-----------|-----------|-----------|-----------|-----------|
| $a(\text{Å})$     | 6.106(1)  | 6.0821(8) | 6.095(3)  | 6.088(2)  | 6.104(5)  | 6.094(4)  |
| $b(\text{Å})$     | 10.560(2) | 10.552(1) | 10.556(7) | 10.544(4) | 10.666(8) | 10.687(8) |
| $c(\text{Å})$     | 9.5728(6) | 9.6057(9) | 9.597(5)  | 9.589(8)  | 9.533(3)  | 9.478(4)  |
| $\beta(\text{°})$ | 101.72(1) | 101.69(8) | 101.70(6) | 101.90(3) | 100.75(5) | 101.06(3) |
| $d(\text{Å})$     | 9.70      | 9.70      | 9.70      | 9.70      | 9.70      | 9.70      |

|                   | $\text{MnPS}_3$ <sup>[1]</sup> | $\text{K}_{0.4}\text{Mn}_{0.8}\text{PS}_3$ <sup>[2]</sup> | $\text{K}_{0.32}[\text{Zn}_2\text{L}]_{0.04}\text{Mn}_{0.8}\text{PS}_3$ <sup>[2]</sup> | $\text{K}_{0.24}[\text{Cu}_2\text{L}]_{0.08}\text{Mn}_{0.8}\text{PS}_3$ <sup>[2]</sup> |
|-------------------|--------------------------------|-----------------------------------------------------------|----------------------------------------------------------------------------------------|----------------------------------------------------------------------------------------|
| $a(\text{Å})$     | 6.077                          | 6.11                                                      | 6.095                                                                                  | 6.092                                                                                  |
| $b(\text{Å})$     | 10.524                         | 10.59                                                     | 10.571                                                                                 | 10.509                                                                                 |
| $c(\text{Å})$     | 6.796                          | 9.64                                                      | 10.415                                                                                 | 10.417                                                                                 |
| $\beta(\text{°})$ | 107.35                         | 102.20                                                    | 102.56                                                                                 | 102.71                                                                                 |
| $d(\text{Å})$     | 6.50                           | 9.40                                                      | 10                                                                                     | 10                                                                                     |

$d$  interlamellar distance. \*

References:

- (1) Ouvrard, G.; Brec, R.; Rouxel, J. Structural Determination of Some  $\text{MPS}_3$  Layered Phases ( $M = \text{Mn, Fe, Co, Ni}$  and  $\text{Cd}$ ). *Mater. Res. Bull.* **1985**, *20* (10), 1181–1189 DOI: 10.1016/0025-5408(85)90092-3.
- (2) Fuentealba, P.; Paredes-Garcia, V.; Venegas-Yazigi, D.; Silva, I. D. A.; Magon, C. J.; Costa de Santana, R.; Audebrand, N.; Manzur, J.; Spodine, E. Magnetic Properties of Composites Based on the Intercalation of Zn II and Cu II Bimetallic Macrocyclic Complexes in the  $\text{MnPS}_3$  Phase. *RSC Adv.* **2017**, *7* (53), 33305–33313 DOI: 10.1039/C7RA05089E.
